# Supplementary material for: A strategy for modulating the catalytic active center of AP thermal decomposition and its application: La-doped MgCo2O4
Source: Royal Society of Chemistry journal article supplement (doi:10.1039/d3ta00878a), 2023-01-01
Supplement: d3ta00878a1.pdf [file d3ta00878a1.pdf]

# Supporting Information

## A strategy for modulating the catalytic active center of AP thermal decomposition and its application: La-doped $\text{MgCo}_2\text{O}_4$

Guofei Zhang <sup>a</sup>, Xin Yu <sup>a</sup>, Zhenlong Wang <sup>a</sup>, Sirong Li <sup>a</sup>, Zhengyi Zhao <sup>a</sup>, Yunjiong Zhu <sup>a</sup>,

Yude Wang <sup>b\*</sup>, Xuechun Xiao <sup>a\*</sup>

*a School of Materials and Energy, Yunnan University, 650091 Kunming, People's Republic of China*

*b Yunnan Key Laboratory of Carbon Neutrality and Green Low-carbon Technologies, Yunnan University, 650091 Kunming, People's Republic of China*

---

\* To whom correspondence should be addressed. Tel: +86-871-65037399, Fax: +86-871-65153832. E-mail: ydwang@ynu.edu.cn (Y. D. Wang)

\* To whom correspondence should be addressed. Tel: +86-871-65037399, Fax: +86-871-65153832. E-mail: xchxiao@ynu.edu.cn (X. CH. Xiao)

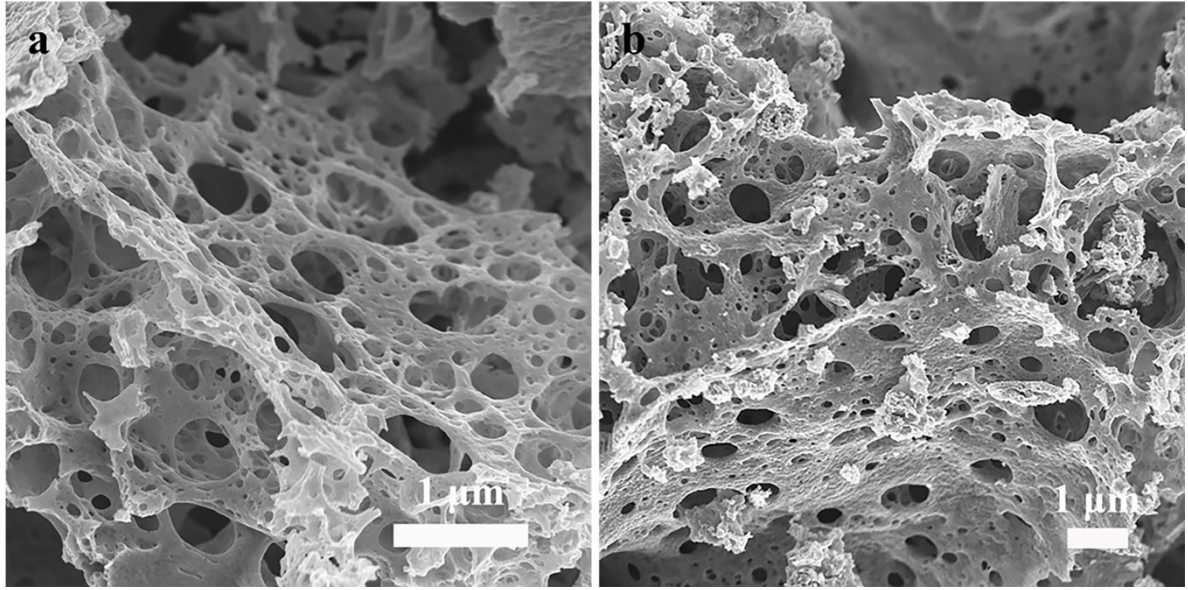

**Fig. S1** The SEM patterns of the as-prepared  $\text{Lax-MgCo}_2\text{O}_4$ : (a)  $x=0.75\%$ , (b)  $x=2\%$ .

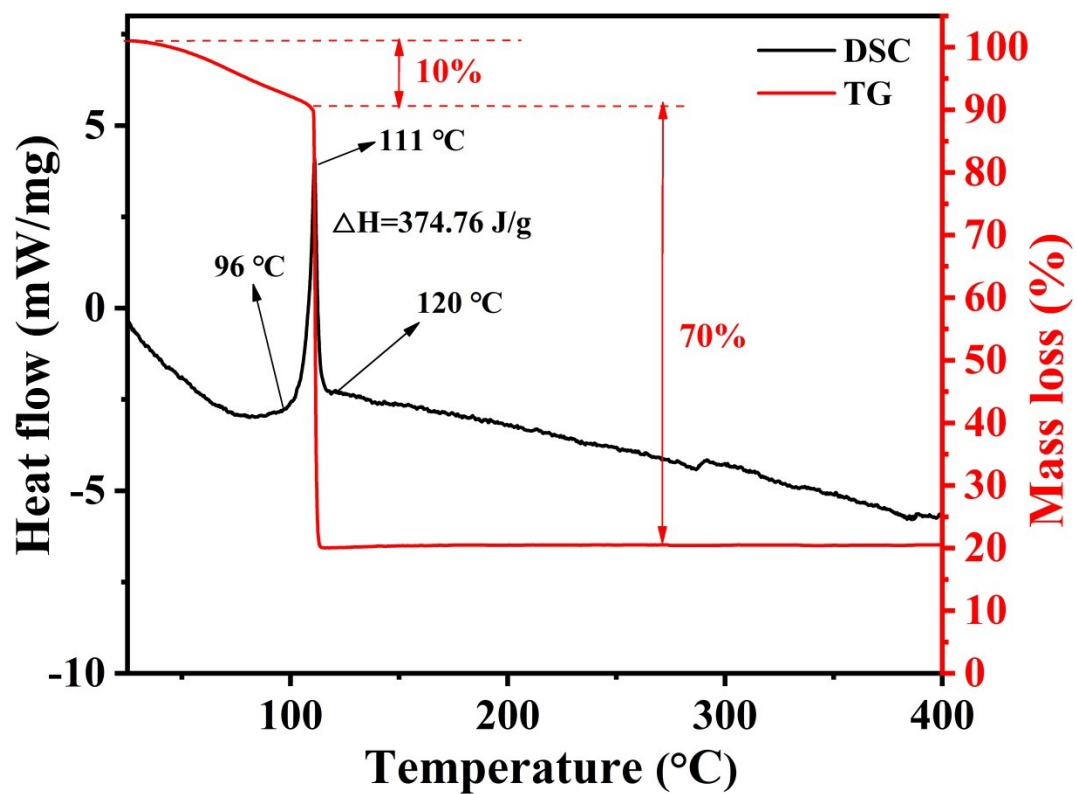

Fig. S2 TG-DSC curve of La1%-MgCo<sub>2</sub>O<sub>4</sub> precursors (Heating rate 5°C/min, holding at 400°C for 1h).

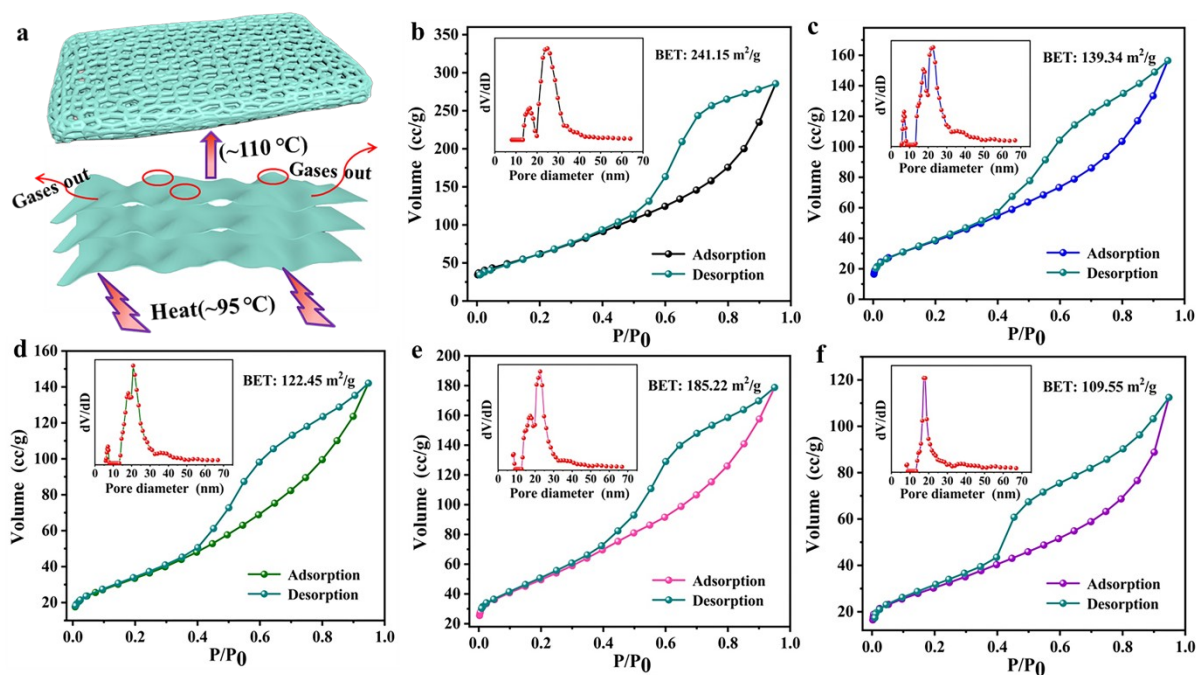

**Fig. S3** (a) The formation process of  $\text{La}_x\text{-MgCo}_2\text{O}_4$  porous structure; Nitrogen adsorption-desorption isotherm of the as-synthesized (b) Pure  $\text{MgCo}_2\text{O}_4$ , (c)  $\text{La}0.5\%-\text{MgCo}_2\text{O}_4$ , (d)  $\text{La}0.75\%-\text{MgCo}_2\text{O}_4$ , (e)  $\text{La}1\%-\text{MgCo}_2\text{O}_4$  and (f)  $\text{La}2\%-\text{MgCo}_2\text{O}_4$ , respectively. Insert is the pore-size distribution calculated by the DFT method from desorption branch of the  $\text{La}_x\text{-MgCo}_2\text{O}_4$ , respectively.

**Table S1** The structural parameters and BET specific surface area of pure MgCo<sub>2</sub>O<sub>4</sub> andLa<sub>x</sub>-MgCo<sub>2</sub>O<sub>4</sub> (x = 0.5%, 0.75%, 1%, 2%).

| Samples                                  | DFT pore size<br>(nm) | DFT pore volume<br>(cm <sup>3</sup> /g) | BET specific surface<br>area (m <sup>2</sup> /g) |
|------------------------------------------|-----------------------|-----------------------------------------|--------------------------------------------------|
| La2%-MgCo <sub>2</sub> O <sub>4</sub>    | 18.14                 | 0.64                                    | 109.55                                           |
| La1%-MgCo <sub>2</sub> O <sub>4</sub>    | 21.71                 | 1.02                                    | 185.22                                           |
| La0.75%-MgCo <sub>2</sub> O <sub>4</sub> | 20.76                 | 0.81                                    | 122.45                                           |
| La0.5%-MgCo <sub>2</sub> O <sub>4</sub>  | 22.71                 | 0.89                                    | 139.34                                           |
| MgCo <sub>2</sub> O <sub>4</sub>         | 16.57                 | 1.62                                    | 241.15                                           |

**Table S2** The relative ratios of  $O_{\text{Latt}}$ ,  $O_{\text{V}}$  and -OH in O 1s of the pure  $\text{MgCo}_2\text{O}_4$  and La $x$ - $\text{MgCo}_2\text{O}_4$  ( $x = 0.5\%$ ,  $0.75\%$ ,  $1\%$ ,  $2\%$ ).

| Samples                            | $O_{\text{Latt}}$<br>relative content (%) | $O_{\text{V}}$<br>relative content (%) | -OH<br>relative content (%) |
|------------------------------------|-------------------------------------------|----------------------------------------|-----------------------------|
| La2%- $\text{MgCo}_2\text{O}_4$    | 47.31                                     | 35.16                                  | 17.53                       |
| La1%- $\text{MgCo}_2\text{O}_4$    | 43.17                                     | 43.96                                  | 12.87                       |
| La0.75%- $\text{MgCo}_2\text{O}_4$ | 46.08                                     | 41.02                                  | 12.90                       |
| $\text{MgCo}_2\text{O}_4$          | 43.15                                     | 40.84                                  | 16.01                       |

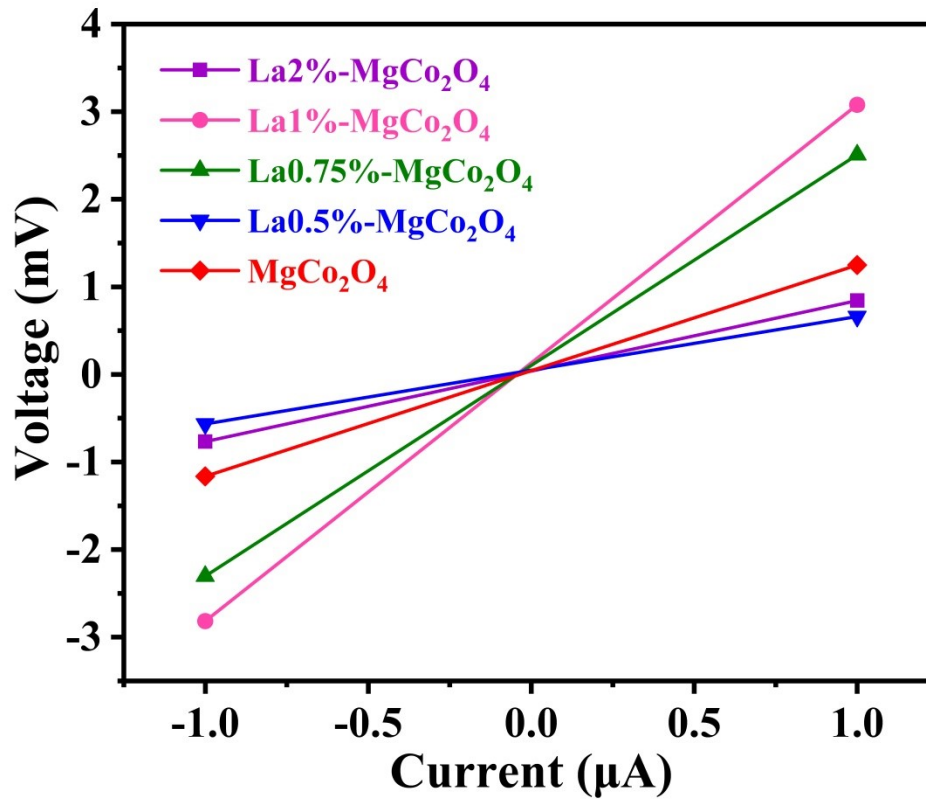

Fig. S4 Current-voltage curve of pure  $\text{MgCo}_2\text{O}_4$  and  $\text{La}_x\text{-MgCo}_2\text{O}_4$  ( $x=0.5\%$ ,  $0.75\%$ ,  $1\%$  and  $2\%$ ).

**Table S3** The carrier concentration and P/N type of pure MgCo<sub>2</sub>O<sub>4</sub> and La<sub>x</sub>-MgCo<sub>2</sub>O<sub>4</sub> (x=0.5%, 0.75%, 1% and 2%).

| Samples                                  | Hall coefficient<br>(cm <sup>3</sup> ·c <sup>-1</sup> ) | Resistivity<br>(ohm·cm) | Carrier concentration<br>(cm <sup>-3</sup> ) | P/N type |
|------------------------------------------|---------------------------------------------------------|-------------------------|----------------------------------------------|----------|
| La2%-MgCo <sub>2</sub> O <sub>4</sub>    | 3.62×10 <sup>2</sup>                                    | 28.87                   | 3.40×10 <sup>16</sup>                        | P        |
| La1%-MgCo <sub>2</sub> O <sub>4</sub>    | 3.13×10 <sup>1</sup>                                    | 28.24                   | 1.99×10 <sup>17</sup>                        | P        |
| La0.75%-MgCo <sub>2</sub> O <sub>4</sub> | 1.04×10 <sup>2</sup>                                    | 30.02                   | 8.43×10 <sup>16</sup>                        | P        |
| La0.5%-MgCo <sub>2</sub> O <sub>4</sub>  | 1.50×10 <sup>2</sup>                                    | 30.41                   | 4.17×10 <sup>16</sup>                        | P        |
| MgCo <sub>2</sub> O <sub>4</sub>         | 1.69×10 <sup>2</sup>                                    | 121.46                  | 3.68×10 <sup>16</sup>                        | P        |



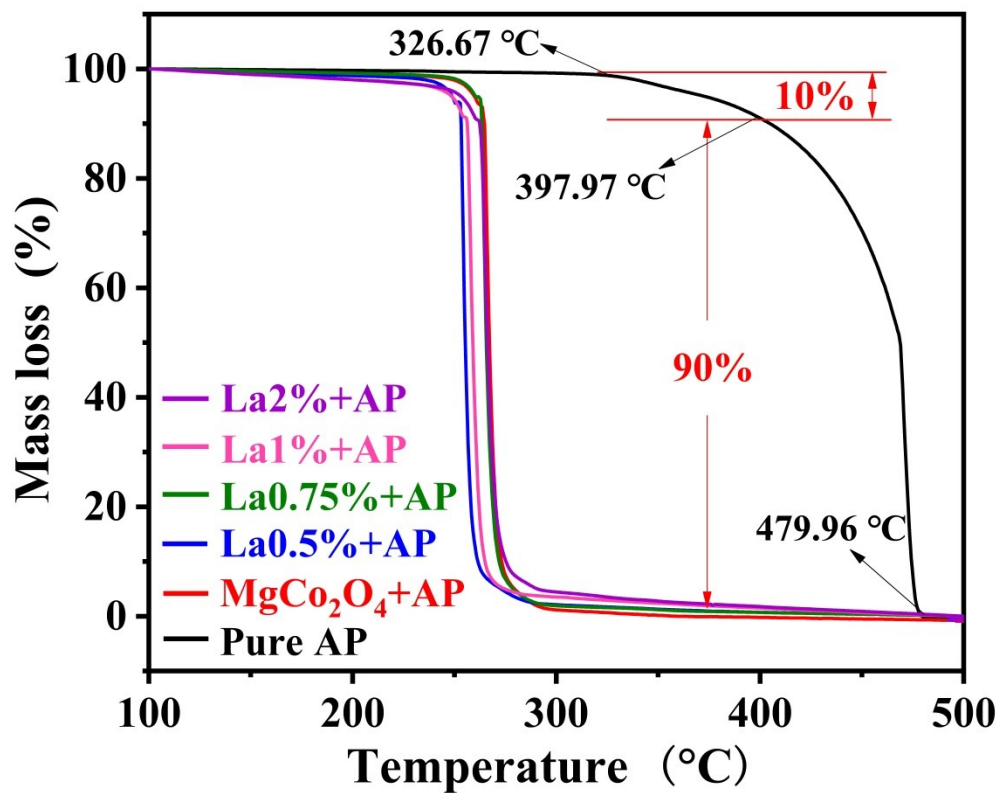

Fig. S5 TG curves of the AP thermal decomposition with and without pure MgCo<sub>2</sub>O<sub>4</sub> and

Lax-MgCo<sub>2</sub>O<sub>4</sub> (x=0.5%, 0.75%, 1% and 2%).

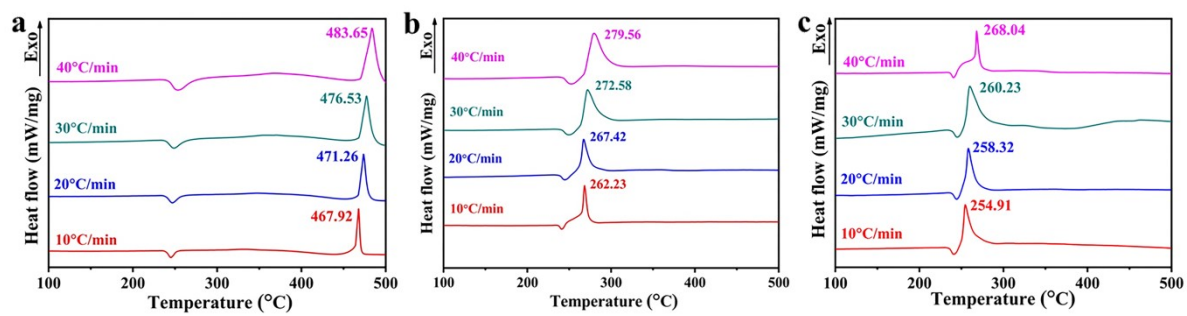

**Fig. S6** DSC curves at the different heating rate (10, 20, 30, 40 °C·min<sup>-1</sup>): (a) Pure AP, (b) 2% pure MgCo<sub>2</sub>O<sub>4</sub> + AP, (c) 2%La1%-MgCo<sub>2</sub>O<sub>4</sub> + AP, respectively.

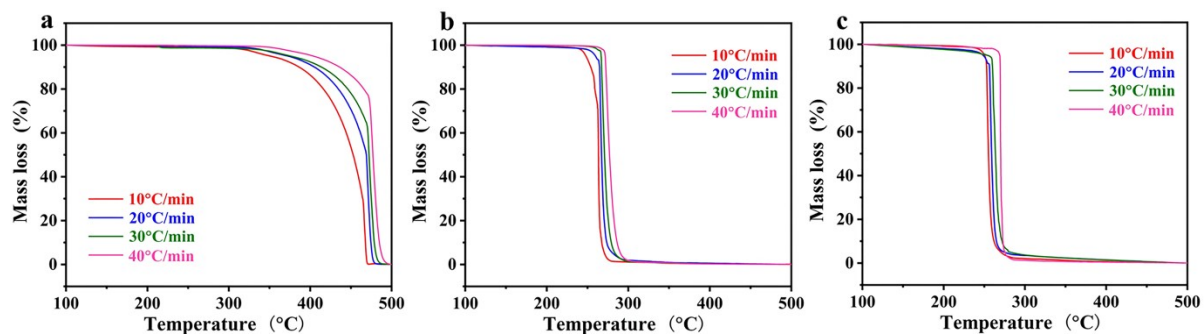

**Fig. S7** TG curves at the different heating rate (10, 20, 30, 40 °C·min<sup>-1</sup>): (a) Pure AP, (b) 2% pure MgCo<sub>2</sub>O<sub>4</sub> + AP, (c) 2%La1%-MgCo<sub>2</sub>O<sub>4</sub> + AP, respectively.

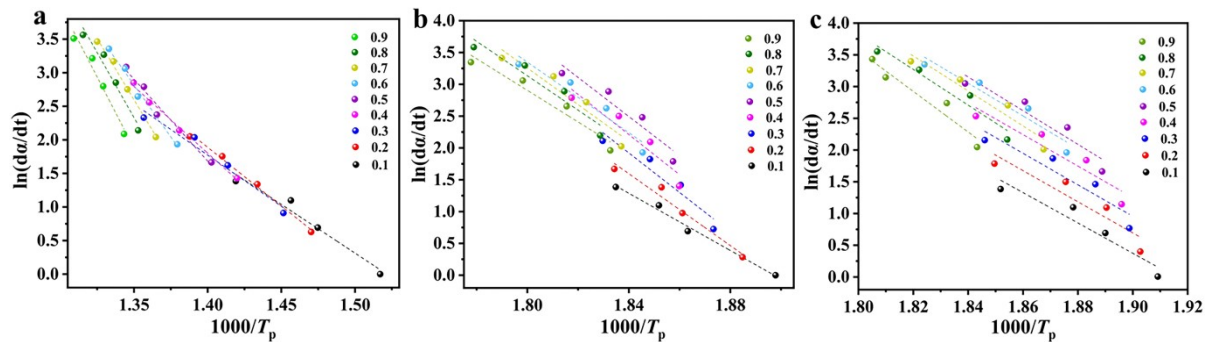

**Fig. S8** Linear fit curve to TG analysis using Friedman method ( $\alpha$  increments of 0.1): (a) Pure AP, (b) 2% pure  $\text{MgCo}_2\text{O}_4$  + AP, (c) 2%La1%- $\text{MgCo}_2\text{O}_4$  + AP, respectively.

**Table S4** TG kinetic results calculated by Friedman method.

| Conversion<br>( $\alpha$ ) | Friedman method ( $E_{aF}$ , kJ·mol <sup>-1</sup> ) |                                            |                                                 |
|----------------------------|-----------------------------------------------------|--------------------------------------------|-------------------------------------------------|
|                            | Pure AP                                             | 2%MgCo <sub>2</sub> O <sub>4</sub> +<br>AP | 2%La1%-MgCo <sub>2</sub> O <sub>4</sub> +<br>AP |
| 0.1                        | 199.54                                              | 166.28                                     | 157.98                                          |
| 0.2                        | 221.38                                              | 186.81                                     | 160.02                                          |
| 0.3                        | 228.81                                              | 188.89                                     | 161.29                                          |
| 0.4                        | 236.42                                              | 190.25                                     | 162.95                                          |
| 0.5                        | 249.76                                              | 191.46                                     | 161.87                                          |
| 0.6                        | 272.13                                              | 180.68                                     | 165.46                                          |
| 0.7                        | 284.64                                              | 188.52                                     | 170.43                                          |
| 0.8                        | 295.87                                              | 181.99                                     | 178.75                                          |
| 0.9                        | 300.28                                              | 184.56                                     | 187.07                                          |

**Table S5** Comparison of catalytic activity of AP by various catalysts.

| Samples                                            | $M$<br>% | $\beta$<br>$^{\circ}\text{C}\cdot\text{min}^{-1}$ | Decrease<br>of $T_{HTD}$<br>( $^{\circ}\text{C}$ ) | Decrease<br>of $E_a$<br>( $\text{kJ}\cdot\text{mol}^{-1}$ ) | Increase<br>of $k$<br>( $\text{s}^{-1}$ ) | Refs.     |
|----------------------------------------------------|----------|---------------------------------------------------|----------------------------------------------------|-------------------------------------------------------------|-------------------------------------------|-----------|
| Flower-like Ni                                     | 3        | 10                                                | 70.00                                              | -                                                           | -                                         | [52]      |
| Nanosheets $\text{Co}_3\text{O}_4$                 | 2        | 20                                                | 132.30                                             | 57.9                                                        | -                                         | [11]      |
| 3DOM $\text{Fe}_2\text{O}_3/\text{Co}_3\text{O}_4$ | 1        | 20                                                | 49.94                                              | 61.1                                                        | -                                         | [17]      |
| $\text{Co}_3\text{O}_4@\text{MnO}_2$               | 2        | 10                                                | 112.00                                             | -                                                           | -                                         | [53]      |
| Nanoparticles $\text{CoFe}_2\text{O}_4$            | 3        | 20                                                | 89.50                                              | 16.15                                                       | 0.08                                      | [54]      |
| Hollow $\text{NiCo}_2\text{O}_4$                   | 1        | 20                                                | 49.94                                              | -                                                           | -                                         | [18]      |
| Nano $\text{FeCo}_2\text{O}_4$                     | 2        | 20                                                | 196.25                                             | 93.70                                                       | 1.20                                      | [27]      |
| MXene/ $\text{ZnCo}_2\text{O}_4$                   | 2        | 20                                                | 132.00                                             | 111.7                                                       | -                                         | [55]      |
| Nanosheets La1%-<br>$\text{MgCo}_2\text{O}_4$      | 2        | 20                                                | 215.16                                             | 120.39                                                      | 3.62                                      | This work |

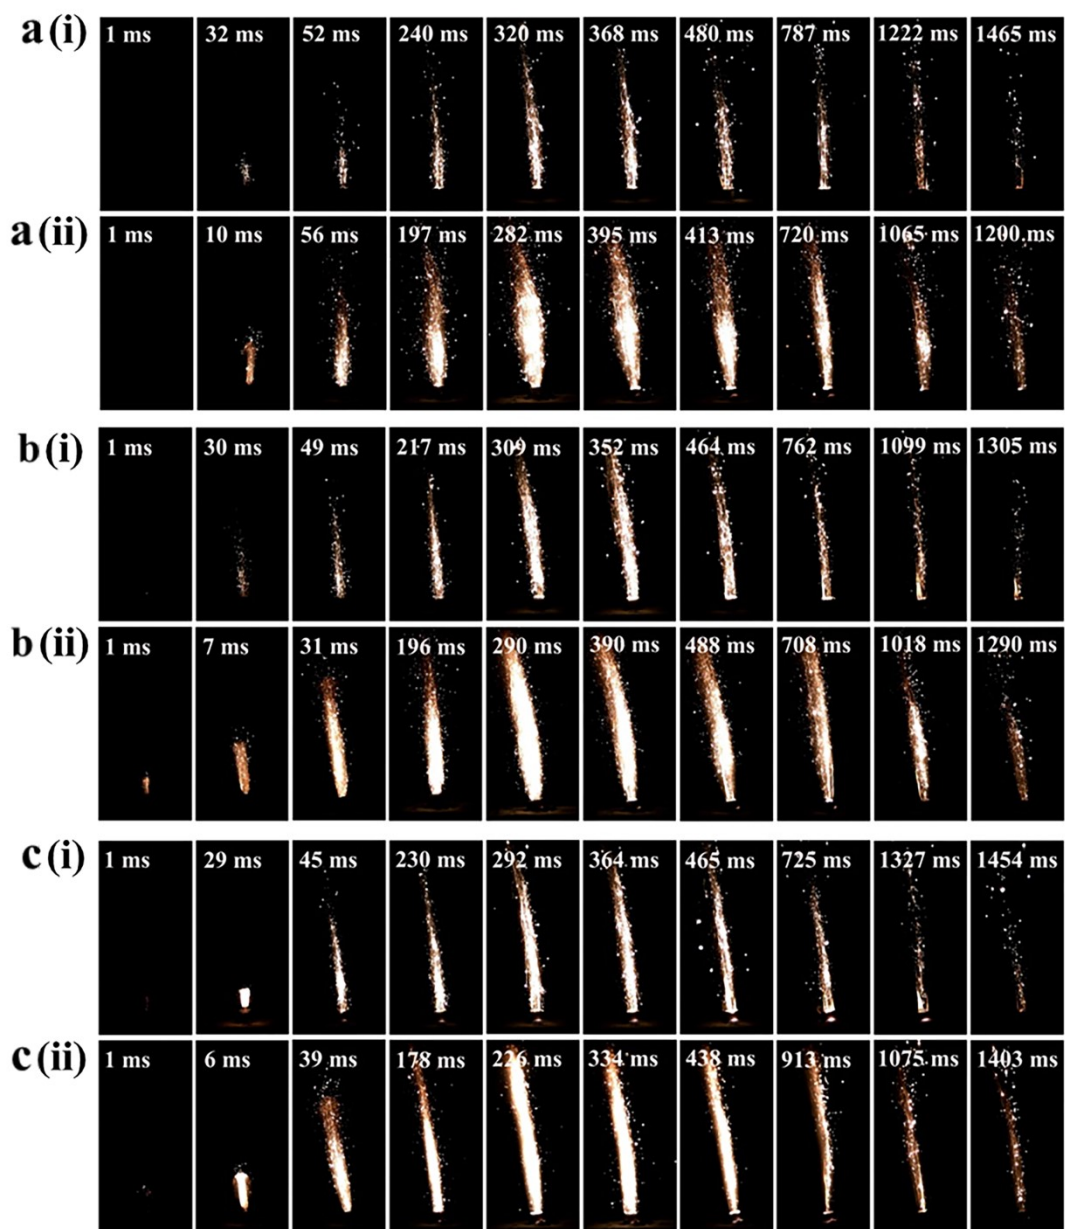

**Fig. S9** Laser ignited combustion of (a(i)) AP/HTPB, (a(ii)) La1%-MgCo<sub>2</sub>O<sub>4</sub>-AP/HTPB (Ignition voltage is 22 V); (b(i)) AP/HTPB, (b(ii)) La1%-MgCo<sub>2</sub>O<sub>4</sub>-AP/HTPB (Ignition voltage is 34 V); (c(i)) AP/HTPB, (c(ii)) La1%-MgCo<sub>2</sub>O<sub>4</sub>-AP/HTPB (Ignition voltage is 46

V).
